# LNISKS: Reference-free mutation identification for large and complex crop genomes

Radosław Suchecki<sup>1,3,\*</sup>, Ajay Sandhu<sup>2</sup>, Stéphane Deschamps<sup>2</sup>, Victor Llaca<sup>2</sup>, Petra Wolters<sup>2</sup>, Nathan S. Watson-Haigh<sup>1,4</sup>, Margaret Pallotta<sup>1</sup>, Ryan Whitford<sup>1</sup> and Ute Baumann<sup>1,\*</sup>

<sup>1</sup>*School of Agriculture, Food and Wine, University of Adelaide, Waite Campus, Urrbrae, SA 5064, Australia*

<sup>2</sup>*DuPont Pioneer Hi-Bred International Inc., 7250 NW 62nd Avenue, Johnston, IA 50131-0552, USA*

<sup>3</sup>*Present address: CSIRO Agriculture and Food, Waite Campus, Urrbrae, SA 5064, Australia*

<sup>4</sup>*Bioinformatics Hub, School of Biological Sciences, University of Adelaide, Adelaide, SA 5005, Australia*

\*Correspondence: [ute.baumann@adelaide.edu.au](mailto:ute.baumann@adelaide.edu.au), [rad.suchocki@csiro.au](mailto:rad.suchocki@csiro.au)

March 19, 2019

## Abstract

Mutation discovery is often key to the identification of genes responsible for major phenotypic traits. In the context of bulked segregant analysis, common reference-based computational approaches are not always suitable as they rely on a genome assembly which may be incomplete or highly divergent from the studied accession. Reference-free methods based on short sequences of length  $k$  ( $k$ -mers), such as NIKS, exploit redundancy of information across pools of recombinant genomes. Building on concepts from NIKS we introduce LNISKS, a mutation discovery method which is suited for large and repetitive crop genomes. In our experiments, it rapidly and with high confidence, identified mutations from over 700 Gbp of bread wheat genomic sequence data. LNISKS is publicly available at <https://github.com/rsuchocki/LNISKS>.

## 1 Introduction

2 Bulk segregant analysis (BSA) involves pooling recombinant genomes to facilitate rapid identification of genetic markers associated with phenotypic traits (Michelmore *et al.*, 1991; Giovannoni *et al.*, 1991). Mapping-by-sequencing (MBS) combines BSA with second generation sequencing (SGS) to enable simultaneous mutation identification and mapping (Schneeberger *et al.*, 2009). This original approach for identifying mutations in ethyl methanesulfonate (EMS) mutagenised populations relied on selection-induced patterns within genome-wide allele frequency (AF) in pooled genomes and was initially based on pooling 500 mutant F<sub>2</sub> plants for sequencing. However back- or out-crossing of the mutagenised plants eliminates mutation load not linked to the causative mutation(s) as only offspring demonstrating the desired phenotype are retained (Zuryn *et al.*, 2010). One such approach is MutMap where a mutant is crossed with the original wild-type followed by selfing of the offspring, which results in segregation of phenotypic differences in F<sub>2</sub> progeny (Abe *et al.*, 2012). Based on the assumption that the causative mutation occurs with highest frequency among bulked segregants a combination of isogenic BSA with deep candidate resequencing was applied to detect subtle allele frequency differences between closely linked mutations to facilitate the identification of causal ones (Hartwig *et al.*, 2012). This technique can also be extended to identification of causal mutations from multiple independent mutagenesis events (Yan *et al.*, 2017).

17 MBS is most powerful with whole genome sequencing (WGS) data but methods based on RNA and, more commonly, enrichment sequencing (e.g. exome capture) have been developed to address the issues of sequencing cost and computational challenges, particularly in the case of large and complex plant genomes (Gardiner *et al.*, 2014; Mascher *et al.*, 2014; Pankin *et al.*, 2014; Ramirez-Gonzalez *et al.*, 2015; Gardiner *et al.*, 2016; van Esse *et al.*, 2017; Wang *et al.*, 2017). Alternative methods, such as MutChromSeq (Sánchez-Martín *et al.*, 2016) and TACCA (Thind *et al.*, 2017) rely on sequencing and assembly of flow sorted mutant chromosomes. Recently, AgRenSeq (Arora *et al.*, 2018) was proposed as a powerful approach for detecting multiple disease resistance genes from crop wild relative diversity panels. AgRenSeq is particularly notable for its innovative way of linking phenotyping values to genotypic information represented by  $k$ -mers, which bares some resemblance to the HAWK approach used for disease association mapping in humans (Rahman *et al.*, 2018).

27 A number of computational approaches have been developed for identifying mutations in MBS, mostly  
28 relying on a reference genome for aligning SGS reads (Candela *et al.*, 2015). However, reference-based  
29 approaches are not always applicable or sufficient, typically due to lack of a suitable reference genome. The  
30 suitability of a reference genome depends on its completeness and level of conservation with the studied  
31 accession, which, particularly for large repetitive polyploids, needs to be high to allow reliable read alignment  
32 and subsequent variant calling. Considering the high diversity within globally cultivated crop species such  
33 as wheat (Jordan *et al.*, 2015; Krasileva *et al.*, 2017), there is no guarantee that the reference genome will  
34 be sufficiently similar to the studied variety in the chromosomal region of interest, e.g. due to presence of  
35 sequences introgressed from related species.

36 The established needle in the  $k$ -stack (NIKS) algorithm (Nordström *et al.*, 2013) allows reference-free  
37 identification of homozygous mutations from WGS data. Briefly, two sets of  $k$ -mers are extracted from WGS  
38 reads. Set  $W$  contains  $k$ -mers from homozygous wild-type, and set  $M$  contains  $k$ -mers from homozygous  
39 mutant. A SNP can be represented by up to  $k$   $k$ -mers in each of the two sets, these are the  $k$ -mers of interest.  
40 For example given the following sequence with a single base mutation:  $ACG[C/T]TTA$ , we identify three  
41 3-mers  $\{CGC, GCT, CTT\}$  supporting the wild type allele and three 3-mers  $\{CGT, GTT, TTT\}$  supporting  
42 the mutant allele. The remaining 3-mers, namely  $\{ACG, TTA\}$  do not overlap the mutated base. Sets of  
43 sample-specific  $k$ -mers are identified through removal of  $k$ -mers which are present in both sets, that is:  
44  $W \leftarrow W \setminus M$  and  $M' \leftarrow M \setminus W$ . Sample-specific  $k$ -mers from  $W$  and  $M'$  are unambiguously extended  
45 (assembled) separately, yielding sets  $C(W')$  and  $C(M')$  of contigs (or unitigs) which in NIKS nomenclature  
46 are called seeds. Of particular interest are contigs of length  $2k - 1$  which are likely to be centred around a  
47 mutated base, as there are up to  $k$   $k$ -mers representing a SNP. Contigs from  $C(W')$  are then paired with  
48 contigs from  $C(M')$  to identify the mutations.

49 We have built on NIKS concepts to develop LNISKS (longer needle in a scanner  $k$ -stack, Figure 1), a high-  
50 throughput pipeline with a number of original features including a highly-parallelized assembly algorithm. We  
51 also introduce  $k$ -mer filters which can be generated from external data. The filters are expected not to contain  
52  $k$ -mers matching those which support a putative causative mutation and so can be safely used to reduce the  
53 search-space and the incidence of false-positive calls. In addition, LNISKS addresses some of the challenges  
54 arising from uneven coverage common to SGS datasets through post-pairing extension of seeds under  $2k - 1$   
55 bp. While NIKS has been shown to work in Arabidopsis (135 Mbp) and in Rice (430 Mbp) (Nordström *et al.*,  
56 2013), our approach scales to wheat-size genomes (17 Gbp).

57 Bread wheat genome is hexaploid and highly repetitive (Wicker *et al.*, 2011; Choulet *et al.*, 2014), so  
58 variant identification can be adversely affected by nearly-identical repeats and highly similar homeologous  
59 genes across the three closely related (sub-) genomes. In  $k$ -mer based approaches specificity can be improved  
60 e.g. by increasing  $k$ , potentially at the cost of reduced sensitivity. Longer  $k$ -mers are more likely to be  
61 unique within the genome, but require higher sequencing coverage to provide contiguous representation of  
62 the genome. As the number of  $k$ -mers in a genome increases with value of  $k$ , so does the computational cost  
63 of generating sets  $W$  and  $M$  from WGS, and comparing between them. We utilize KMC2/KMC3 (Deorowicz  
64 *et al.*, 2015; Kokot *et al.*, 2017), which allows fast, memory-efficient  $k$ -mer counting for  $k$  up to 256 and  
65 equally importantly, database level operations on sets of  $k$ -mers – most pertinently subtraction. A customized  
66 version of KMC3 has recently been shown to speed-up the early stages of the NIKS pipeline while reducing  
67 its memory requirements (Kokot *et al.*, 2017).

68 We have used LNISKS to identify a mutation underlying *ms5* genic male sterility in bread wheat (Pallotta  
69 *et al.*, 2019). In addition to a causative SNP, LNISKS also identified mutations underlying the markers which  
70 contributed to narrowing the *Ms5/ms5* critical region. The WGS data underlying these results comes from  
71 20 *Ms5* (wild-type) and 40 *ms5* (mutant) plants. The mutant and-wild type bulks were generated from a  
72 cross of *ms5* mutant plants with a male-fertile sib and the resulting  $F_2$ 's were screened for homozygosity at  
73 the *TaMs5-A* locus using 5 markers. The combined genome coverage was  $\approx 19X$  and  $\approx 23X$  for wild-type  
74 and mutant bulks respectively. Based on these datasets we demonstrate the utility of LNISKS and explore  
75 some of its parameter space to shed light on capabilities and limitations of our approach.

## 76 Results

77 We assess the accuracy of our pipeline and explore the effects of the innovations introduced in LNISKS. The  
78 first of our performance measures relies on the fact that we are looking for ethyl methanesulfonate (EMS)  
79 mutations, which are expected to be overwhelmingly G/C to A/T transitions (Greene *et al.*, 2003). While  
80 exploring the parameter space the proportion of such transitions among our calls serves as a key benchmark  
81 of our pipeline's accuracy. Another measure we employ relates to the expected lengths of seeds (contigs)

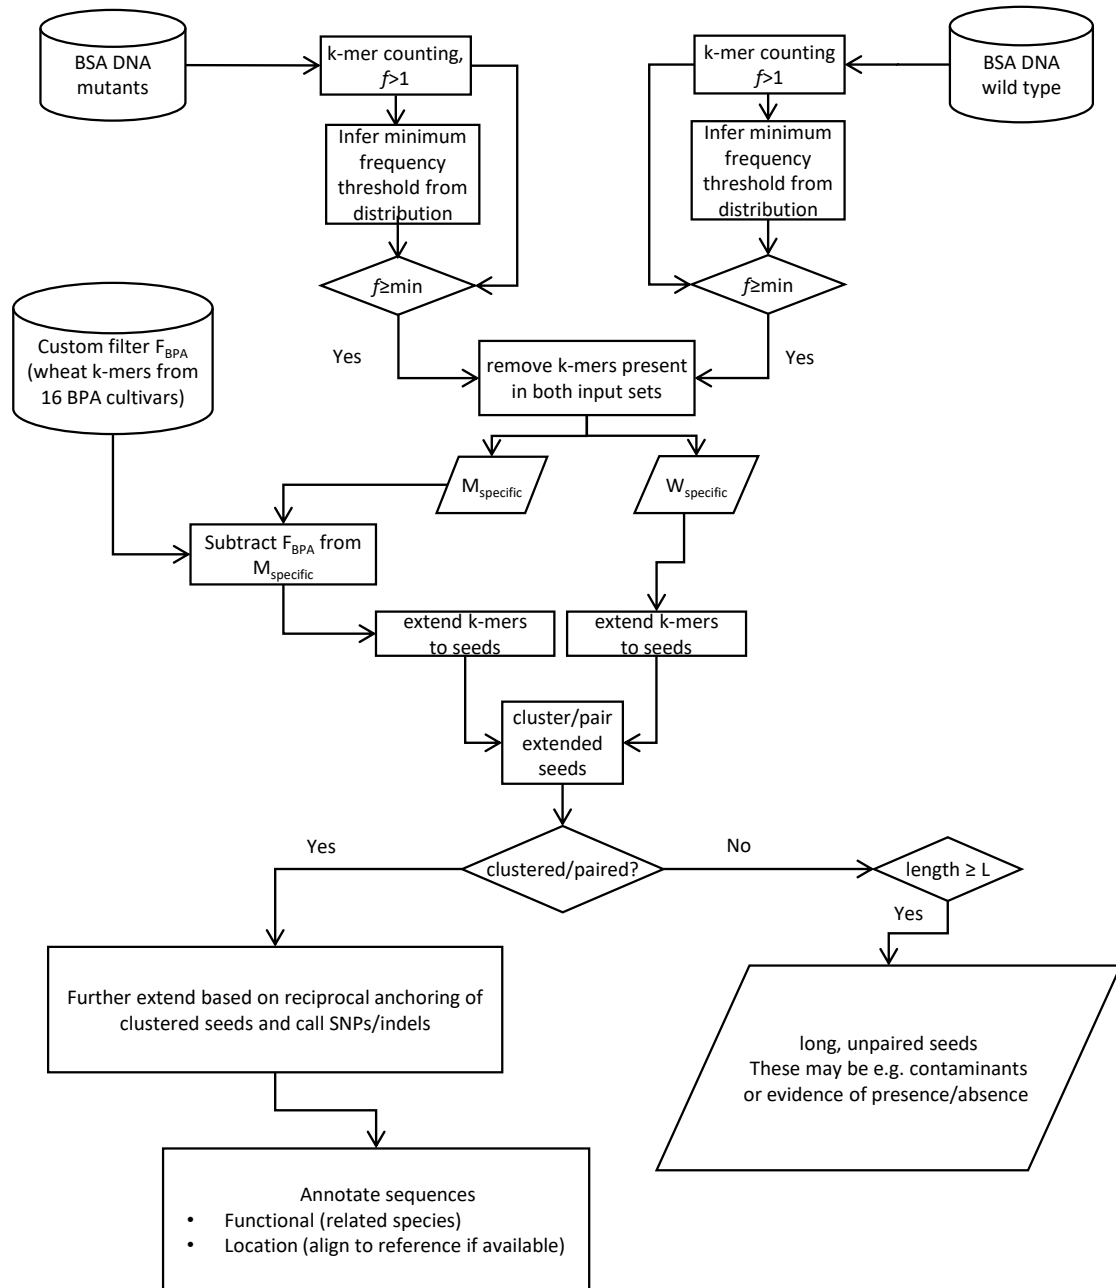

Figure 1: High-level overview of LNISKS approach.

82 extended from sets of sample-specific  $k$ -mers and consequently, to the paired/clustered seeds alignment length.  
83 A pair of contigs of length  $2k - 1$  bp with a single nucleotide polymorphism in the centre is the expected  
84 ideal for yielding a high-confidence variant call, as each of the two contigs is composed of all  $k$   $k$ -mers which  
85 overlap either the wild-type or the mutated base, respectively. We classify such calls in the highest confidence  
86 category A. For a number of reasons however, contigs may either be shorter or longer than  $2k - 1$  bp. Pairs  
87 where variant position is  $k$  bases from one of the ends may also be of interest. We place calls corresponding  
88 to these pairs in confidence category B. All the remaining calls are assigned to category C as most likely to  
89 be spurious. The additional category D covers a subset of category B calls with more than one varying site  
90 per pair of sequences and at least one of these being  $k$  bases from a contig/alignment end. It covers the rare  
91 cases of two or more mutations within  $k$  bases from one another.

## 92 The choice of $k$

93 Longer  $k$ -mers are more likely to be unique within a genome. Analysis of  $k$ -mer frequency plots (Figure 2) for  
94 *Ms5/ms5* data suggests that the longest  $k$ -mer for which the distribution does not appear to be truncated for  
95 either of the two input datasets is  $k \approx 56$ . Higher  $k$  values in combination with limited sequencing coverage  
96 available result in an increased proportion of the target sequence not being captured by  $k$ -mers. Therefore, we  
97 would set  $k$  at or slightly below that value for further analysis. For illustrative purposes we explore a range of  
98  $k$  values,  $k \in \{24, 32, \dots, 72\}$  and note that unless explicitly stated, the presented results pertain to LNISKS  
99 run at  $k = 54$ . The choice of  $k$  affects mainly accuracy but to some extent also computational requirements.

## 100 Application of k-mer filters removes non-EMS-derived calls

101 Recall that the crucial step in the LNISKS (and NIKS) approach is the identification of the two sets of  $k$ -mers  
102 which appear in only one of the two bulks (typically wild-type and mutant). In LNISKS, once we obtain  
103 sets  $W'$  and  $M'$  of such sample-specific  $k$ -mers, we apply a novel  $k$ -mer filtering step, which is subject to  
104 availability of suitable data and specific biological context of the input datasets. Our experiments show that  
105 this step greatly reduces the number of  $k$ -mers considered for the assembly. This eases the computational  
106 requirements and helps to reduce the number of candidate mutations by discarding loci which may be regarded  
107 as irrelevant due to their presence in genomes which do not produce a given phenotype. As illustrated by  
108 Table 1, filtering reduces the number of calls to be considered/validated. The percentage of G/C to A/T  
109 transitions also indicates that the filtered-out calls are overwhelmingly not EMS-derived. Across the explored  
110 values of  $k$ , G/C to A/T transitions constitute about two thirds of category A SNPs, compared to around  
111 one third for other categories. If we apply our custom filtering step, the proportion of G/C to A/T transitions  
112 among category A calls increases to over 95% (Table 1), thereby approaching the level expected for EMS  
113 mutations (Greene *et al.*, 2003). The number of category A calls and the number of G/C to A/T transitions  
114 called from category A clusters is highest at  $k \approx 54$  (Table 1) which is close to the choice of  $k$  that could be  
115 made based on the preliminary analysis of  $k$ -mer distributions for a range of  $k$  values (Figure 2), as described  
116 above.

## 117 Identification of mutations linked to TaMs5-A

118 Identification of the gene underlying the *TaMs5* locus relied on several bi-parental mapping populations,  
119 varied genomic and transcriptomic datasets as well as a range of bioinformatic techniques employed to gen-  
120 erate relevant molecular markers for mapping the causative locus (Pallotta *et al.*, 2019). Mutations between  
121 *Ms5* wild-type and the *ms5* mutant detected by LNISKS underlie many of the molecular markers contribut-  
122 ing to that effort. The overall numbers of mutations detected are summarized in Table 1. The detected  
123 SNPs include a non-synonymous mutation in a gene demonstrated to be causative for *ms5* sterility (Pal-  
124 lotta *et al.*, 2019). It is found among putative mutations reported by our pipeline for the explored values of  
125  $k \in \{24, 32, 40, 48, 52, 56, 64, 72\}$  irrespective of whether filters have been applied. This should not however  
126 be treated as an indication that the choice of the value of  $k$  or the filters do not matter, although the number  
127 of marker SNPs detected was similar at various settings. This may reflect the fact that sequences which are  
128 more unique across the genome were more suitable for use as markers and are also more easily detectable  
129 from BSA data. Note that the application of custom filters is of little relevance when identifying SNPs for  
130 molecular markers as the presence or otherwise of a SNP in other cultivars need not affect its suitability for  
131 that purpose. This is echoed in the negligible influence of the use of filters on the number of detected SNPs  
132 which were ultimately used as molecular markers (see Table 2).

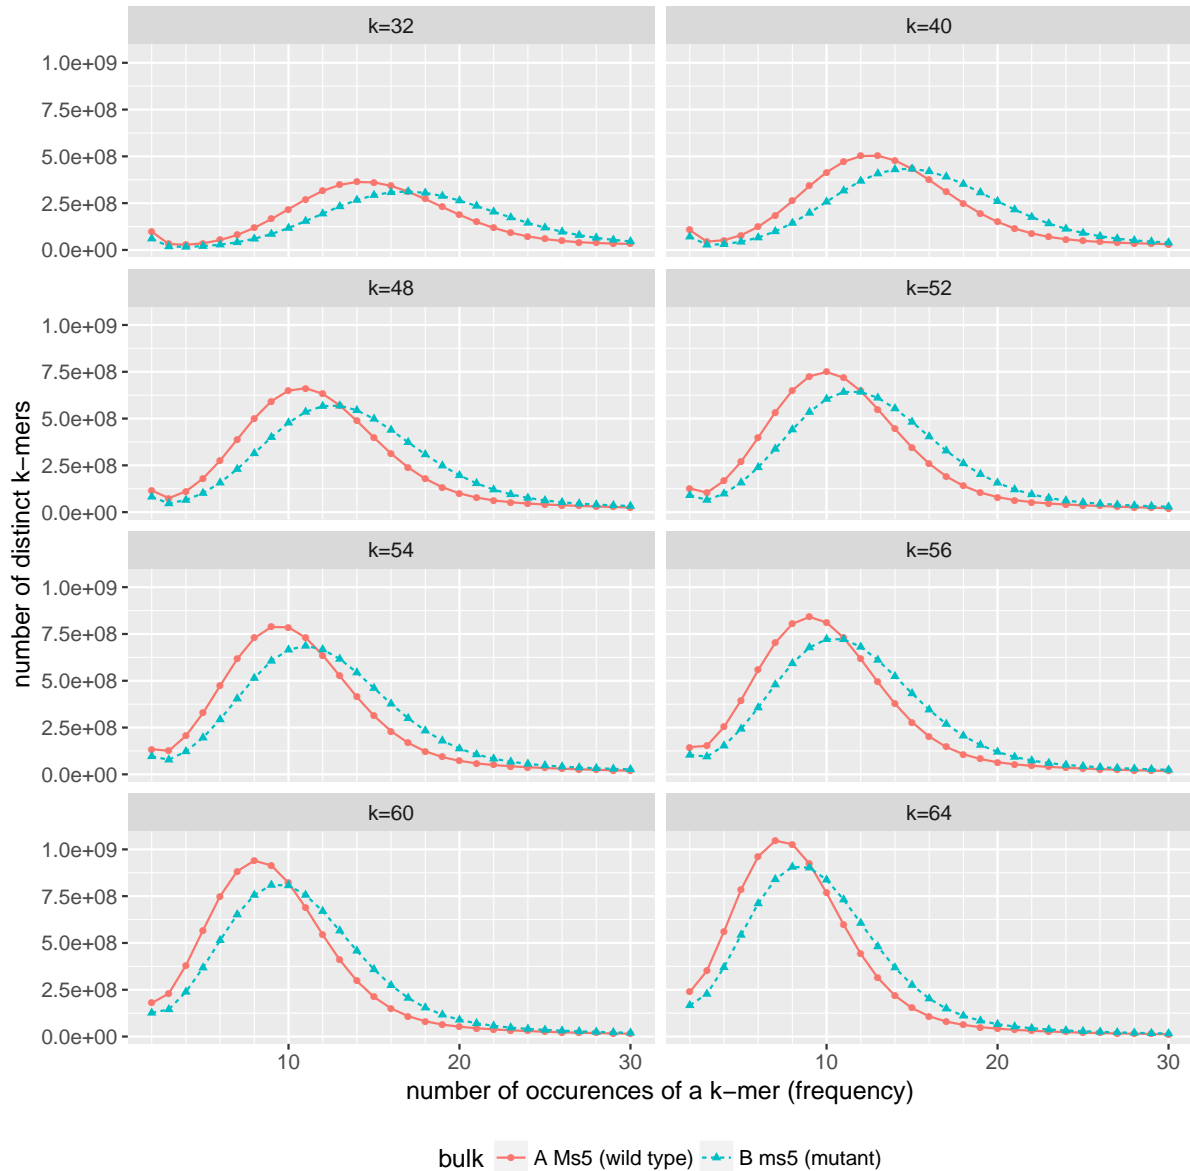

Figure 2: With increasing  $k$ , the number of distinct  $k$ -mers increases, but the frequency distribution shifts to the left, eventually becomes truncated and no longer captures the inflection point at frequency  $\approx 3$ . This indicates insufficient sequencing coverage for contiguous assembly of mutation harbouring sequences at or above  $k \approx 60$ . We can also observe that at low values of  $k$  the number of distinct  $k$ -mers is relatively low. This indicates that such short  $k$ -mers are unlikely to deliver sufficient specificity. Note that counts of  $k$ -mers of frequency 1 are not reported as these primarily reflect sequencing errors.

Table 1: Numbers of paired seed for a range of  $k$  values. Each pair of seeds supports one or more putative mutations. Assignment to a confidence category A,B or C is based on the length of the alignment and the position of called mutation(s) within it (see text for details). The subscript <sub>filtered</sub> indicates results obtained from runs where custom filters were applied to the set of  $k$ -mers from the mutant pool as described in experimental procedures. The bottom row indicates the percentage G/C to A/T transitions which are expected to dominate among true calls. These are largely consistent across the range of  $k$  values so we do not provide a per  $k$  breakdown.

| k          | Number of paired seeds per confidence category |                         |       |                       |        |                       |        |                       |       |                       |
|------------|------------------------------------------------|-------------------------|-------|-----------------------|--------|-----------------------|--------|-----------------------|-------|-----------------------|
|            | All                                            | All <sub>filtered</sub> | A     | A <sub>filtered</sub> | B      | B <sub>filtered</sub> | C      | C <sub>filtered</sub> | D     | D <sub>filtered</sub> |
| 24         | 12,652                                         | 4,792                   | 2,758 | 1,579                 | 7,160  | 2,710                 | 2,734  | 505                   | 249   | 16                    |
| 32         | 17,192                                         | 7,079                   | 4,629 | 2,753                 | 9,297  | 3,630                 | 3,266  | 698                   | 431   | 32                    |
| 40         | 28,113                                         | 13,176                  | 5,848 | 3,824                 | 15,419 | 6,702                 | 6,846  | 2,652                 | 529   | 50                    |
| 48         | 34,416                                         | 15,170                  | 7,155 | 4,679                 | 18,855 | 7,392                 | 8,406  | 3,101                 | 813   | 76                    |
| 52         | 34,561                                         | 14,955                  | 7,678 | 5,005                 | 19,785 | 7,405                 | 7,098  | 2,547                 | 483   | 56                    |
| 54         | 36,747                                         | 15,789                  | 7,766 | <b>5,228</b>          | 21,547 | 7,861                 | 7,434  | 2,702                 | 609   | 58                    |
| 56         | 51,539                                         | 21,770                  | 7,656 | 4,967                 | 30,805 | 11,831                | 13,078 | 4,974                 | 689   | 58                    |
| 58         | 80,229                                         | 42,908                  | 7,343 | 4,276                 | 44,788 | 22,926                | 28,098 | 15,708                | 671   | 64                    |
| 60         | 83,342                                         | 44,681                  | 7,379 | 4,455                 | 47,372 | 23,901                | 28,591 | 16,327                | 725   | 82                    |
| 64         | 95,873                                         | 50,790                  | 6,540 | 4,029                 | 53,250 | 26,769                | 36,083 | 19,994                | 811   | 126                   |
| 72         | 63,532                                         | 59,557                  | 4,381 | 4,641                 | 38,083 | 32,817                | 21,068 | 22,101                | 213   | 122                   |
| G/C to A/T | 36.1%                                          | 64.3%                   | 67.5% | <b>95.3%</b>          | 34.0%  | 61.9%                 | 26.8%  | 52.9%                 | 37.2% | 68.0%                 |

Table 2: Number of key confidence category A markers identified at varying  $k$  values, with or without the application of custom  $k$ -mer filters.

| k          | 24 | 32 | 40 | 48 | 52 | 54 | 56 | 64 | 72 |
|------------|----|----|----|----|----|----|----|----|----|
| unfiltered | 17 | 18 | 22 | 21 | 20 | 19 | 20 | 18 | 18 |
| filtered   | 17 | 18 | 22 | 22 | 21 | 20 | 20 | 19 | 17 |

### 133 Evaluation of mutation calls using a reference genome assembly

134 With more complete and contiguous wheat assemblies becoming available (Clavijo *et al.*, 2017; Zimin *et al.*,  
 135 2017; IWGSC, 2018), we are able to use these to evaluate a significant proportion, though certainly not all,  
 136 called variants. This limited applicability is to be expected, as the assemblies are for Chinese Spring, a variety  
 137 distinct from Chris which is *ms5* background. The reference based evaluation is two-fold. We first focus on  
 138 false positive calls which are a major issue for many reference-free approaches (Leggett and MacLean, 2014).  
 139 This can be done using any one of the three aforementioned assemblies. We align paired seeds to the IWGSC  
 140 RefSeq v1.0 (IWGSC, 2018) genome assembly to identify false positive calls postulated by those pairings.  
 141 If each of the sequences from a given pair aligns to a different chromosomal location, the pairing is almost  
 142 certainly spurious and so is the associated call. The results of this evaluation are summarized in Table 3. We  
 143 were able to unambiguously align both seeds from over 90% of pairs which support category A calls. Among  
 144 these, less than 0.5% were shown to be false-positive based on conflicting alignment locations. If custom  
 145  $k$ -mer filtering is applied, almost 95% of pairs unambiguously align and the associated false-positive rate falls  
 146 to 0.1%.

147 The second reference-based evaluation relies on *a priori* information about the expected physical location  
 148 of the locus of interest. Back-crossing is expected to remove EMS-derived mutations from the genomes of the  
 149 individuals, except for regions linked to the locus causing the phenotype. We expect a concentration of SNPs  
 150 in the linked regions. For *ms5*, this should be in the centromeric region of chromosome 3A. This evaluation is  
 151 made possible by the IWGSC RefSeq v1.0 assembly (IWGSC, 2018) which allows investigation of the detected  
 152 mutation load across the pseudo-chromosomes which incorporate an overwhelming majority of the assembled  
 153 sequences. As illustrated by Figure 3, the G/C to A/T transitions are concentrated on chromosome 3A with  
 154 certain blocks, primarily also on chromosome 3A, marked with presence of other mutations which are unlikely  
 155 to be EMS-derived. These could indicate allelic variation associated with the *ms5* background Chris, and  
 156 the majority of these are discarded if we apply our custom filtering step. We also observe a band of G/C to  
 157 A/T mutations at  $\approx$  550 Mbp. This location corresponds to a super-scaffold in IWGSC RefSeq v1.0 which  
 158 is most likely incorrectly placed within the pseudo-chromosome. Syntenic ordering of proteins along pseudo-  
 159 chromosome 3A against pseudo-chromosome 3B as well as related species suggest that the super-scaffold  
 160 should be placed at  $\approx$  100 Mbp point.

Table 3: Paired contigs for  $k = 53$  were aligned to the reference genome allowing 1bp indels and up to 3 mismatches per 100bp. Orphaned alignment of just one of the elements of a pair indicates that the other element did not align or that it aligned equally well at multiple locations. Although the SNPs represented by the multi-aligned sequences cannot be easily classified as false positive (FP) they are dubious at best. If both sequences from a pair align unambiguously to the reference, we compare their alignment positions and easily identify FP calls wherever the two contigs align to distinct locations in the reference genome.

|                                  | A     | A <sub>filtered</sub> | B      | B <sub>filtered</sub> | C     | C <sub>filtered</sub> |
|----------------------------------|-------|-----------------------|--------|-----------------------|-------|-----------------------|
| Input (pairs)                    | 7,742 | 4,418                 | 20,661 | 6,837                 | 7,352 | 2,544                 |
| Orphaned                         | 410   | 89                    | 5,152  | 1,541                 | 2,538 | 901                   |
| Both aligned (placed)            | 7,032 | 4,177                 | 10,146 | 3,217                 | 1,427 | 339                   |
| Both aligned (percentage)        | 90.8% | 94.5%                 | 49.1%  | 47.1%                 | 19.4% | 13.3%                 |
| Matched position                 | 7,000 | 4,173                 | 9,465  | 3,091                 | 873   | 214                   |
| Identified False Positives (IFP) | 32    | 4                     | 681    | 126                   | 554   | 125                   |
| IFP as percentage of placed      | 0.46% | 0.10%                 | 6.7%   | 3.9%                  | 38.8% | 36.9%                 |
| IFP as percentage of input       | 0.41% | 0.09%                 | 3.3%   | 1.8%                  | 7.5%  | 4.9%                  |

161 When we look at chromosome 3A in more detail (Figure 4), we observe a large block (40 Mbp – 500Mbp)  
162 where many of G/C to A/T transitions display high support values, which reflect the number of plants  
163 contributing the underlying  $k$ -mer information. Furthermore, we observe how the application of custom filters  
164 discards many non-EMS derived SNPs, often concentrated just outside the large block rich in G/C to A/T  
165 transitions.

## 166 Computational cost

167 Through the use of state-of-the-art tools such as KMC2/3 and VSEARCH (Rognes *et al.*, 2016) as well as  
168 extensive use of multi threading, LNISKS can process datasets consisting of billions of reads within hours.  
169 All *in silico* experiments were executed on an allocation of 32G of RAM and 16 logical cores on a compute  
170 cluster containing two nodes, each with 72 Intel Xeon E5-2699 v3 CPUs (2.30GHz), 770 Gigabytes RAM and  
171 two RAID0 SSDs for temporary files. Typical wall-clock run time of the pipeline ( $k = 53$ ) was 2 hours and  
172 33 minutes, which compares favourably with the 2 hours required for sequential, single-threaded reading and  
173 decompression of the same input data. The total CPU time for this run was 26 hours and 34 minutes. Where  
174 applicable, additional time is required for pre-computing custom filter database(s). For lower  $k$  values it may  
175 also be necessary to further extend paired seeds to facilitate better (sequence similarity based) functional  
176 annotation of contigs underlying putative mutations.

## 177 Mutation identification from heterozygous data - proof-of-concept

178 Both NIKS and LNISKS are designed for detecting homozygous mutations. This enables straightforward sub-  
179 traction of  $k$ -mers which in turn makes the approaches computationally tractable. This is a direct consequence  
180 of the fact that an overwhelming majority of  $k$ -mers are discarded by the subtraction step and the subsequent  
181 operations are carried in a much reduced search space. Here we present a proof-of-concept approach, where  
182 with the tool set comprised of KMC2/3, our custom filters as well as our `vcclusters` and `seedmers` modules,  
183 we are able to quickly identify the *ms5* causative mutation and some of the key marker-SNPs for the locus  
184 when one of the input datasets (*Ms5* fertile) comes from plants which are phenotypically indistinguishable  
185 from the homozygous wild-type but known to be heterozygous based on marker information. This (third) bulk  
186 is comprised of 20 individuals, and the estimated combined sequencing depth was just under 15X assuming  
187 17 Gbp genome. In this analysis we also use the bulk of 20 homozygous mutant individuals (23X combined  
188 sequencing depth) and custom filters. Because of the lower sequencing coverage of one of the input sets we  
189 chose a lower  $k$ ,  $k = 40$ . This approach identifies 3297 putative mutations, including 1519 calls supported by  
190  $k$   $k$ -mers each. Among these, 88% are G/C to A/T transitions, and include the *ms5* causative mutation and  
191 mutations representing 10 of the key markers used in the *ms5* mapping (compare to corresponding LNISKS  
192 results in Table 2).

193 To provide an estimate of the specificity of the calls we have aligned pairs of postulated wild-type and  
194 mutant sequences to IWGSC RefSeq v1.0 assembly. In 2213 or 67% of cases, both sequences aligned to  
195 the same locus. Among the 1519 high confidence calls supported by  $k$   $k$ -mers, 1358 (89.4%) sequence pairs  
196 aligned to the same locus. Of these, 1286 (94.7%) aligned to chromosome 3A.

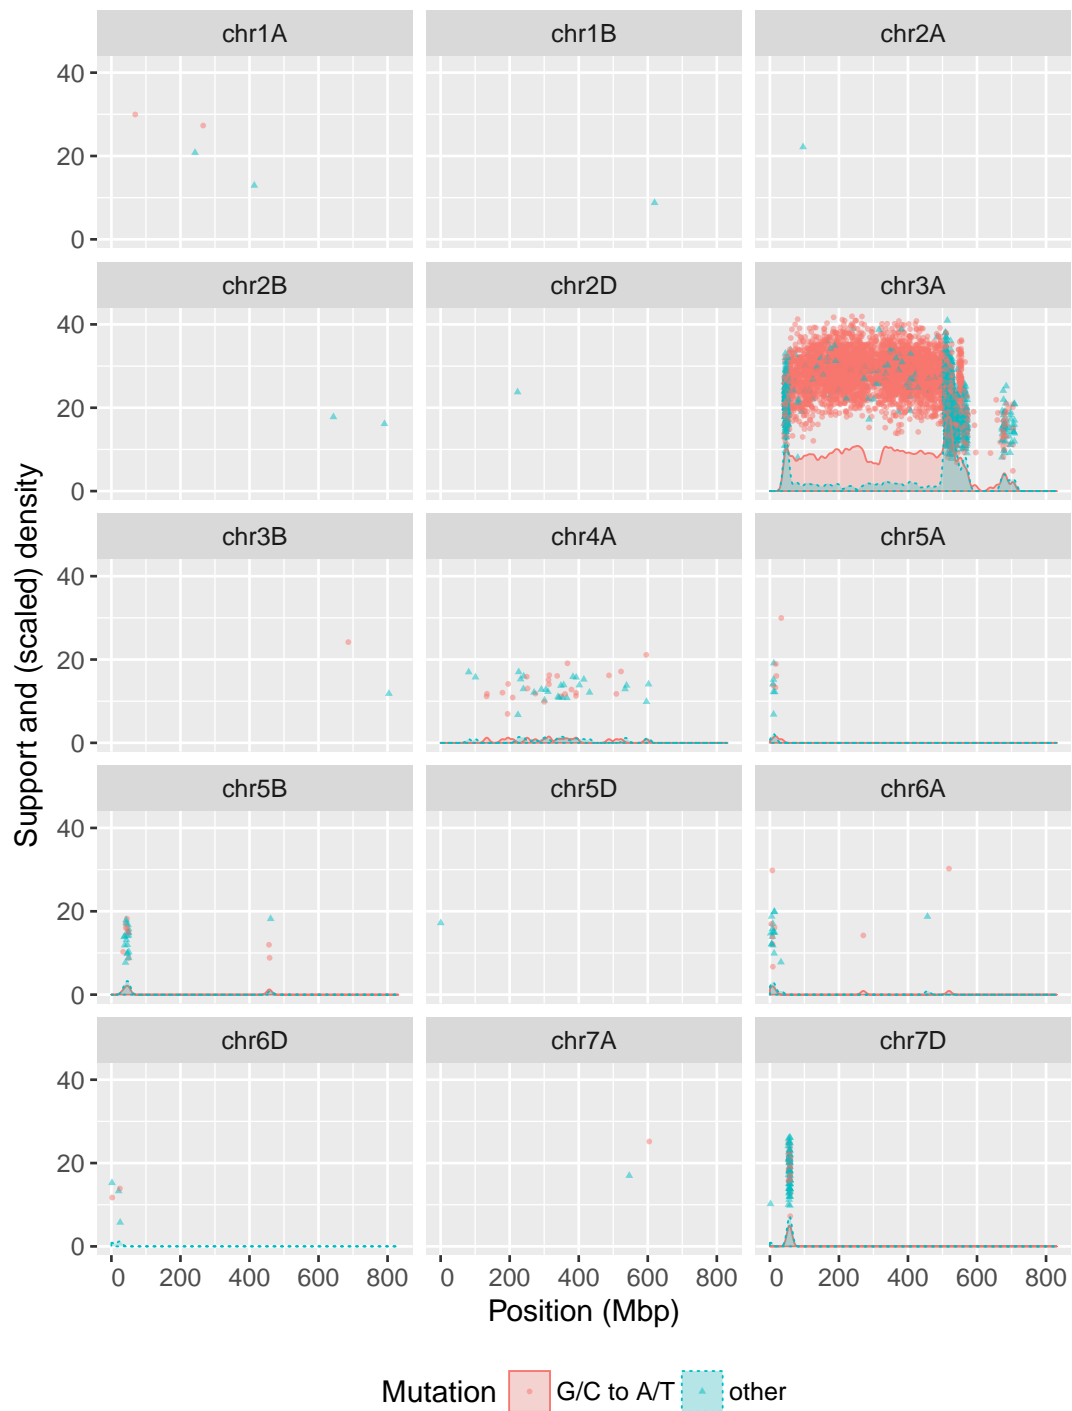

Figure 3: Confidence category A mutations identified without the application of filters, distributed along pseudo-chromosomes. Overall, 81.7% (83.7% filtered) of category A calls and 89% (92.8% filtered) of G/C to A/T transitions assigned to a chromosomal position are concentrated on chromosome 3A. Pseudo-chromosomes with no putative mutations assigned are not shown. Support for a given call is a simple measure calculated based on presence of  $k$ -mers supporting wild-type (mutated) allele in wild-type (mutant) plants. It is a crude reflection of the number of plants contributing evidence for a given call. The coloured areas under curves represent density of mutations within 5Mbp bandwidth. To aid visualisation (Wickham, 2009), the density estimate values are scaled as follows  $\sqrt{\text{density} \times n \times 10^7}$ , where  $n$  is the number of points.



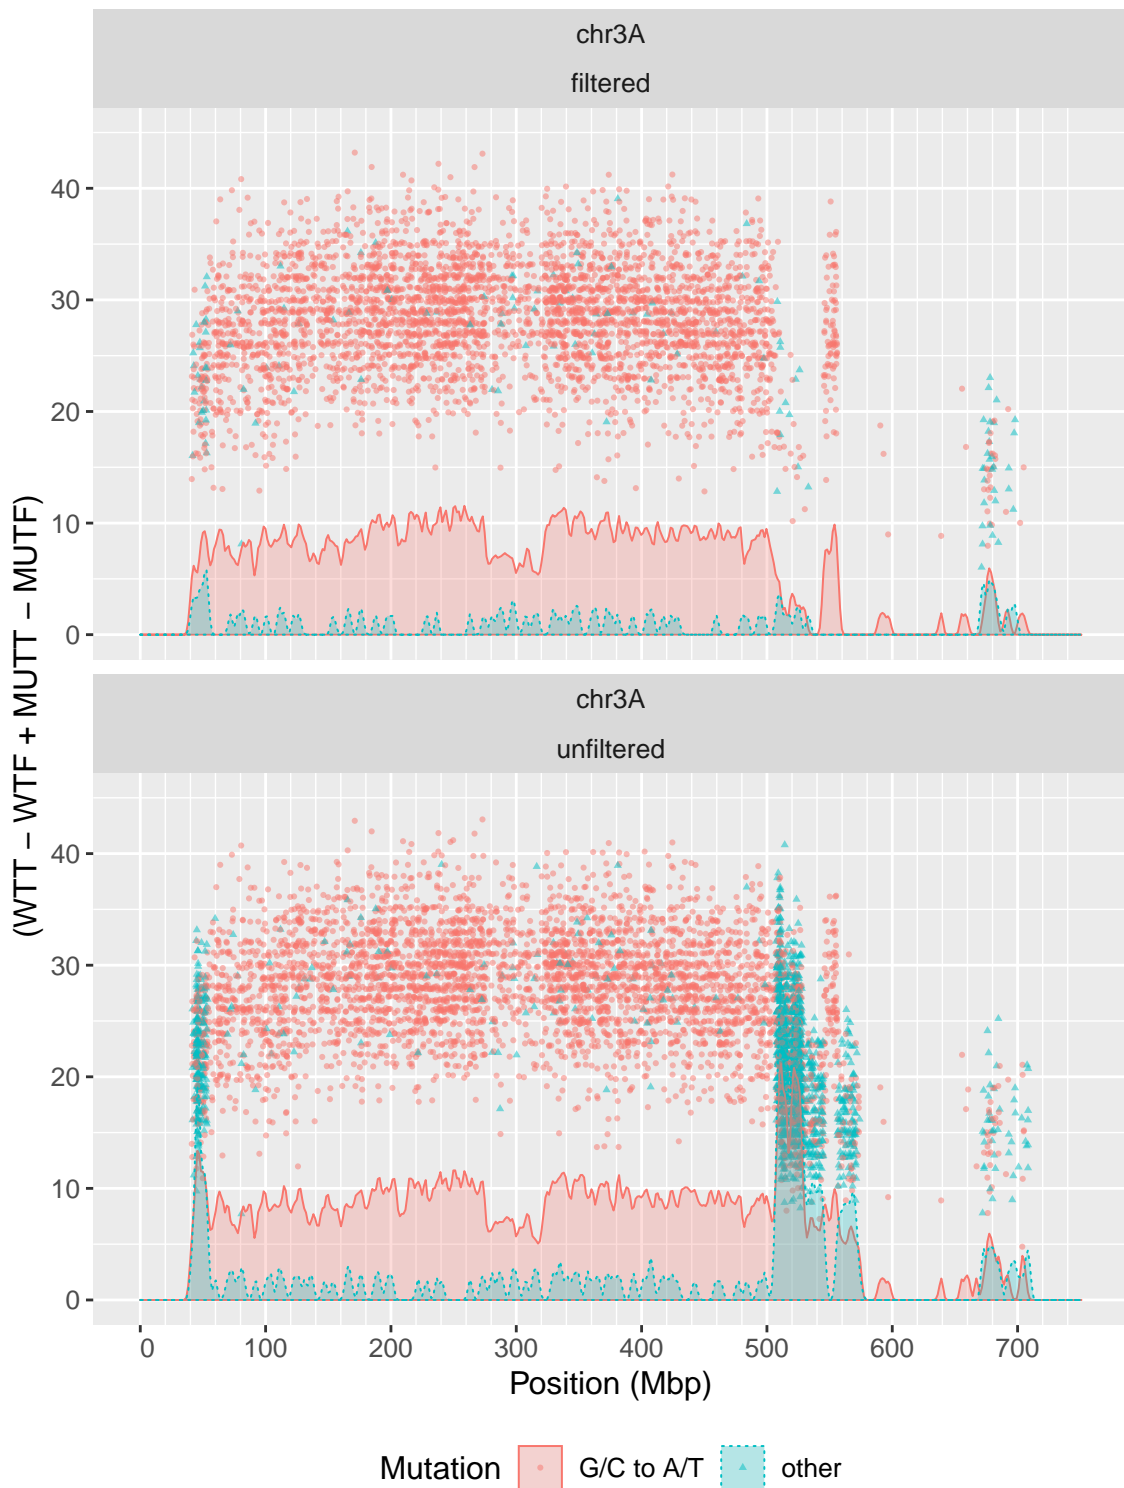

Figure 4: Confidence category A mutations distributed along the 3A pseudo-chromosome. Position of an individual data point along the y axis reflects the number of plants contributing  $k$ -mers which support the corresponding mutation. The coloured areas represent density of mutations within 1Mbp bandwidth. To aid visualisation, the density estimate values are scaled as follows  $\sqrt{\text{density} \times n \times 10^7}$ , where  $n$  is the number of points.

197 Although this approach appears to be less sensitive than LNISKS, this may be at least partly due to the  
198 lower sequencing coverage ( $\approx 15X$ ) available for the fertile heterozygous bulk, further exasperated by the  
199 fact that for the heterozygous portions of the genome (the region of interest), we would require twice the  
200 sequencing coverage for a comparable level of evidence to be available for calling mutations. The available  $\approx$   
201  $15X$  coverage in the region of interest translates to  $\approx 7.5X$  available per allele.

## 202 Availability and dependencies

203 The LNISKS pipeline is freely available at <https://github.com/rsucHECKI/LNISKS> under Apache 2.0  
204 license. Many of the individual components of the pipeline are modules from [https://github.com/  
205 rsucHECKI/yakat](https://github.com/rsucHECKI/yakat) toolkit (Java), which is packaged as a single executable with no dependencies. LNISKS  
206 also utilizes bash, AWK/MAWK and standard Linux tool set. It was developed and tested on Ubuntu Linux  
207 14.04 with Java 8 update 74. It has few dependencies, with KMC2/3 (Deorowicz *et al.*, 2015; Kokot *et al.*,  
208 2017) used for  $k$ -mer counting and set operations and VSEARCH (Rognes *et al.*, 2016) used for seed clustering.

## 209 Discussion

210 Bulk Segregant Analysis supported by modern sequencing technology is a powerful approach for identification  
211 of mutagenesis-derived causative mutations. Our computational approach allows for it to be applied when a  
212 suitable reference genome assembly is not available. Another advantage of  $k$ -mer based mutation identification  
213 directly from the input data is that it is not reliant on the fine-tuning of the alignment parameters. This  
214 effectively adds to computational efficiency of the approach as it reduces the need for parameter space  
215 exploration. Where such exploration of parameter space is necessary, it is fast thanks to operating on much  
216 reduced sets of fixed length sequences ( $k$ -mers). Finally, as illustrated in this work, the subtraction of  $k$ -mers  
217 present in third party datasets amplifies the signal of the targeted mutations, thus further accelerating the  
218 process of candidate gene identification.

219 Low recombination around the *TaMs5-A* locus resulted in a very high number of linked mutations thus  
220 highlighting one of the main risks associated with the approach. Population size, number of meiosis events  
221 and sampling affect how many recombination events are captured for downstream analysis. This coupled with  
222 large genome size translates into considerable cost of undertaking BSA analysis. In some cases this could  
223 potentially be alleviated e.g. by selecting the most informative recombinants based on prior knowledge from  
224 genetic mapping of the locus of interest.

225 The IWGSC reference assembly allowed us to illustrate the validity of our approach. It also indicates that  
226 in cases where the studied accession is sufficiently similar to Chinese Spring, a reference-based approach may  
227 suffice. If however the studied cultivar has, for example, the relevant chromosome (or part of it) introgressed  
228 from a related species then an approach reliant on a reference assembly may not be suitable. Furthermore,  
229 the effective utility of this particular assembly is largely dependent on it being presented as a set of well  
230 constructed pseudo-chromosomes. Such level of contiguity and refinement was not available for any of the  
231 previous assemblies of bread wheat, and may not be available for many other species in the short to medium  
232 term.

233 LNISKS is developed and tested with WGS data in mind but it can be applied to other types of sequence  
234 data such as RNA-Seq. Using RNA-Seq in place of DNA-Seq offers a reduction in cost but carries certain  
235 risks, not least the risk of the targeted gene not being expressed or sufficiently highly expressed in the collected  
236 tissues at a given developmental stage. A causative mutation outside the expressed portion of the genome  
237 will not be detected directly and the identification of the relevant gene or genes by relying on changes in  
238 expression or even lack of expression carries a high level of uncertainty. On the other hand, mutations in  
239 linked genes will likely be detected and these may be used to narrow down the candidate list.

240 Our approach detects short indels as well as SNPs. We do not focus on this functionality, as indels are rare  
241 in EMS-derived data. For example, among category A calls at  $k = 54$ , 1 bp insertions and deletions represent  
242 0.5% of calls, or 0.15% of calls when custom filters are applied. More generally, as already demonstrated by  
243 NIKS, also large indels can be captured, but this requires fine-tuning of parameters when pairing seeds and  
244 calling such mutations.

245 Finally, we have demonstrated how to identify mutations from data derived from heterozygous individuals  
246 but also how such data can be leveraged for prioritising called mutations. More generally, combining KMC for  
247 counting  $k$ -mers and set operations with the tool set we have developed, allows us to go beyond the paradigm  
248 of LNISKS and NIKS to identify and prioritize SNPs across multiple datasets. One could, for example discard  
249 any  $k$ -mers present in all the bulks/datasets under consideration and use our tool set to identify SNPs between  
250 any of the bulks.

## 251 Experimental procedures

252 We provide a general overview of our approach in Figure 1. LNISKS broadly follows the steps of the established  
253 NIKS approach (Nordström *et al.*, 2013). One of the main differences is the application of custom  $k$ -mer  
254 filters. Other innovations which we outline in this section pertain to extension of  $k$ -mers to seeds both before  
255 and after the seeds are clustered/paired. SNP prioritisation and the functional annotation of the underlying  
256 sequences are not core parts of our pipeline, but we do provide the tools required for these operations.  
257 After a brief summary of our library preparation and sequencing protocol, we outline the key elements of our  
258 pipeline, explore the issue of call prioritization and finally detail our proof-of-concept approach for reference  
259 free identification of heterozygous mutations.

## 260 Library construction and sequencing

261 The genomic DNA was prepared according to a library construction protocol developed by Illumina and  
262 sequenced using the Illumina HiSeq2500. DNA was extracted from frozen tissue from 80 individual plants  
263 using the DNAeasy system (Qiagen) according to manufacturer's conditions. Briefly, after genomic DNA was  
264 sheared by sonication using a Covaris S220/E220 system, the resulting DNA fragments were end-repaired  
265 and their 3' ends treated for A-base addition. After ligation of Illumina-specific adapters and gel-based  
266 size-selection, adapter-ligated DNA fragments were subjected to limited PCR amplification with Illumina-  
267 specific PCR primers. Cluster generation and paired-end sequencing of the amplified DNA fragments were  
268 performed on an Illumina cBot and Illumina HiSeq2500, respectively, according to Illumina's instructions.  
269 Sequencing primer hybridization was performed on the cBot and 151 cycle paired-end protocols were used on  
270 the HiSeq2500. Sequences and quality scores were generated with the Illumina pipeline software for image  
271 analysis and base calling. After initial base calling and processing, the sequencing files generated by the  
272 Illumina pipeline were converted to FASTQ format and additional custom quality filtering was performed,  
273 such that reads were trimmed if they harboured one or more base at their 3' end with a quality score  $\leq$   
274 15. Assuming 17 Gbp genome size, sequencing coverage for the bulks was  $\approx 19X$  for the 20 homozygous  
275 wild-type plants,  $\approx 23X$  for the 40 homozygous mutant plants and  $\approx 15X$  for the additional 20 wild-type  
276 plants heterozygous for the locus.

## 277 Custom $k$ -mer filters

278 We have devised a filtering strategy which reduces the computational cost of extending and clustering seeds,  
279 and reduces the number of false positive calls. The mode of use as well as usefulness of such filters depends  
280 on *a priori* knowledge and the availability of suitable sequence data. Filters are in principle best suited for  
281 aiding the detection of dominant mutations when sufficient sequence and phenotypic data are available. When  
282 looking for a dominant allele responsible for a trait we do not expect its exact sequence to be present in a  
283 variety not displaying that trait. In the case of *ms5* the assumption is that a mutation causing such an  
284 unambiguous phenotype (as male sterility) should not be present in cultivated varieties, so the application  
285 of a filter was straightforward also for this recessive mutation. Consequently, we are able to extract sets of  
286 filtering  $k$ -mers from datasets such as the WGS data of 16, predominantly Australian wheat cultivars (Edwards  
287 *et al.*, 2012). We used KMC2 to extract  $k$ -mers,  $k \in \{24, 32, 40, 48, 52, 54, 56, 58, 60, 64, 72\}$  from each of  
288 the 16 datasets. For each  $k$  we have computed a union of the 16 sets, only considering  $k$ -mers occurring at  
289 least twice in a given set,  $k$ -mers occurring only once in a dataset are ignored as they are likely to arise from  
290 sequencing errors in the input reads. Each set  $F$  generated this way holds from  $10.2 \times 10^9$  to  $16.8 \times 10^9$   
291  $k$ -mers with the corresponding KMC database occupying from 41 gigabytes for  $k = 24$  to 338 gigabytes for  
292  $k = 72$ , or the total of 2.2 terabytes for the explored values of  $k$ . We expect that LNISKS user would only  
293 need to generate a database for a single selected  $k$  value. The relations between a filtering set and the input  
294 sets of  $k$ -mers for the selected value  $k = 54$  are illustrated in Figure 5.

## 295 Generation of unambiguous $k$ -mer extensions

296 We have developed a specialized tool for efficient generation of unambiguous extensions (unitigs) from sets of  
297  $k$ -mers. Our `kextender` exploits the fact that due to only sample-specific  $k$ -mers being present in the input,  
298 the implicit De Bruijn graph consists largely, although initially not exclusively, of disconnected sub-graphs,  
299 each representing a unitig. As we construct a map which stores the information from the input  $k$ -mers, we  
300 ensure that this holds for all sub-graphs. For each input  $k$ -mer we store two  $(k - 1)$ -mers, each with a single  
301 bp extension representing the first and the  $k$ th base, respectively. Binary encoded canonical representation  
302 of a  $(k - 1)$ -mer forms the key for a given entry. With each key, we can associate up to four alternative 1

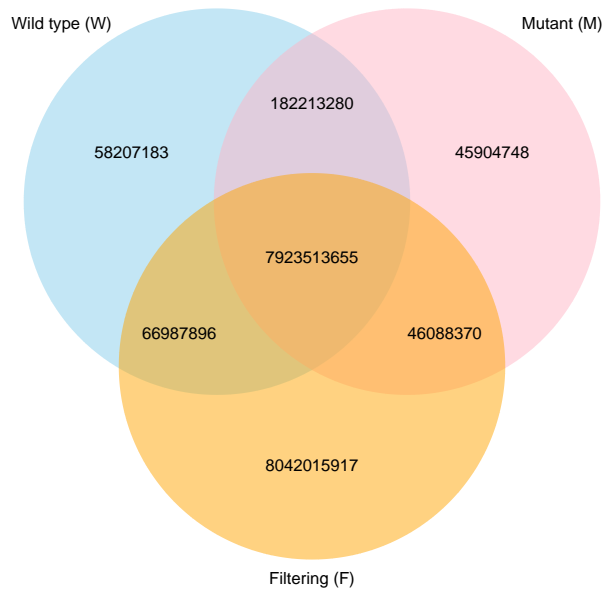

Figure 5: Relations between sets of 54-mers occurring at least twice in each of the datasets. The discarding of  $W \cap M$  greatly reduces computational complexity. This operation discards 8 105 726 935  $k$ -mers and results in the set  $M' = M \setminus W$ ,  $|M'| = 91 993 118$ . In addition, the application of custom filtering set  $F$  allows us to half the number of the  $k$ -mers remaining in  $M'$  as we discard  $F \cap M'$  i.e. 46 088 370  $k$ -mers. The value of the filtering comes from the resulting reduction in the number of non-EMS mutations called.

303 bp extensions on each of the two sides. Presence of  $k$ -mers which are adjacent in the original input sequence  
304 limits the overhead of storing two  $(k - 1)$ -mers rather than a single  $k$ -mer to typically less than 10%. At  
305 this modest cost we gain a convenient, implicit representation of the De Bruin graph, well suited for parallel  
306 traversal for contig construction. A collision in the map construction occurs when for a given  $(k - 1)$ -mer  
307 we store an alternative 1 bp extension at either of the two positions – this invalidates the map entry for that  
308  $(k - 1)$ -mer. After the construction stage we purge the invalidated entries from the map, which ensures that  
309 the underlying implicit De Bruijn graph only contains nodes of degree  $\leq 2$ . Any entry which only holds a  
310 single 1 bp extension is also purged as it only holds redundant information which is also stored with another  
311  $(k - 1)$ -mer. At this stage, map entries representing graph nodes adjacent to the purged ones are recorded in  
312 set  $T$ . Sub-sets of  $T$  are then passed to extender threads which traverse the sub-graphs associated with each  
313 element independently in parallel to build contigs. If two threads happen to start traversing a path underlying  
314 the same unitig from opposite ends, one thread abandons the extension, leaving the other one to continue the  
315 extension process unhindered. Such collisions are rare, at 1 per 25 000 extensions in our experimental set-up.  
316 This will vary depending on size and contiguity of the graph being traversed as well as the number of threads  
317 traversing it.

### 318 Further extension of clustered seeds

319 In the NIKS approach, seeds from the two datasets are paired based on sequence similarity. In principle this  
320 should suffice. In practice however,  $k$ -mer extension to seeds may often fail to reach the desired length of  
321  $2k - 1$  bp. This can be due to insufficient or uneven sequencing coverage or repetitiveness of the sequence in  
322 question, which translates to non-uniqueness of some of the  $k$ -mers which overlap a putative mutation. The  
323 issue of non-uniqueness of  $k$ -mers can be alleviated by increasing  $k$ . However as we increase  $k$ , seed contiguity  
324 may suffer due to insufficient or uneven coverage. Because of that, rather than simply finding best matching  
325 pairs of wild-type and mutant sequences we have opted for similarity-based clustering of all sequences from  
326 the two input datasets. If both the wild-type and the mutant sequence are  $2k - 1$  bp they will most likely be  
327 clustered together as they would if we were simply pairing sequences across the two sets. Clustering however  
328 also allows us to group together multiple incompletely extended seeds which overlap a putative mutation  
329 site. Our `vclusters` module prior to variant calling merges clustered contigs from a given set. For that  
330 we exploit the fact that wild-type and mutant contigs clustered together serve as reciprocal anchors thereby  
331 facilitating extension of contigs to  $2k - 1$  bp. This enables us to identify mutations which would otherwise  
332 remain undetected or classified at a low confidence level among mostly false calls. This extension procedure

333 is only performed if there are no mismatches between the contigs within a given data set. This subroutine is  
334 behind  $\approx 20\%$  of category A calls across the  $k$ -mer lengths explored in our experiments.

### 335 Call prioritisation through $k$ -mer threading

336 We developed the `snpmers` module which facilitates rapid, reference- and alignment-free genotyping of SGS  
337 datasets for a pre-defined set of varying loci, such as the set of category A calls from LNISKS. Information  
338 generated by this module also allows us to prioritize candidate mutation calls. In addition to the homozygous  
339 wild-type (*Ms5*) and homozygous mutant (*ms5*) data, we can also tap into the respective heterozygous  
340 wild-type data. We use the last of these datasets to illustrate the workings of `snpmers` but the module's  
341 application is in no way limited to heterozygous data.

342 We start by extracting set  $H$  of  $k$ -mers from the WGS reads obtained from fertile plants heterozygous for  
343 the *ms5* mutation at the *TaMs5-A* locus. To speed-up the subsequent steps, we start by discarding  $k$ -mers  
344 which are present in both the wild-type and the mutant as these do not capture any of the mutations. We  
345 use KMC2/3 to subtract the intersection of those two sets from  $H$ , i.e.  $H' \leftarrow H \setminus (W \cap M)$ . We next employ  
346 our genotyping module `snpmers` which takes the list of variants called so far as well as a set of  $k$ -mers (in  
347 this case,  $H'$ ). Let  $\mathcal{W}$  be the set of all possible  $k$ -mers overlapping a variant site and matching the wild-type  
348 allele, and let  $\mathcal{M}$  be the set of all possible  $k$ -mers overlapping a variant site and matching the mutant allele.  
349 The  $k$ -mers from  $H'$  are matched to a variant position and their frequencies are recorded, resulting in sets  
350  $H'_{\mathcal{W}}$  and  $H'_{\mathcal{M}}$  of  $k$ -mers from  $H'$  which match the wild-type and the mutant allele, respectively. This provides  
351 us with two measures of support for a given allele at a position:

- 352 (i) the median frequency of  $k$ -mers in  $H'_{\mathcal{W}}$  (or  $H'_{\mathcal{M}}$ )
- 353 (ii) the  $k$ -mer coverage ratio of a given allele  $c(H'_{\mathcal{W}}) = \frac{H'_{\mathcal{W}}}{\mathcal{W}}$  (or similarly  $c(H'_{\mathcal{M}}) = \frac{H'_{\mathcal{M}}}{\mathcal{M}}$ )

354 Based on these measures, the `snpmers` module genotypes the input sample for each of the input loci. In the  
355 context of *TaMs5-A* this allows us to prioritize original calls which are also called as heterozygous in  $H$ .

356 More generally, this approach allows us to assign the two aforementioned measures to both alleles of each  
357 locus for each of our input datasets, including  $W$  and  $M$ . These can then be used to sort or filter the list  
358 of putative mutations to be able to focus on the highest confidence calls. The same measures can also be  
359 computed for individuals which constitute the bulks. Due to shallow sequencing of individual plants we cannot  
360 draw conclusions from absence of evidence for a given allele in a single plant, but wherever there are  $k$ -mers  
361 supporting or contradicting a given call, these can be quantified to approximate the number of plants which  
362 support or contradict that call. For a given call we record how many of the mutant plants yielded one or more  
363  $k$ -mers supporting the postulated mutant allele. We call these mutant-true (MTT). We also record how many  
364 of the mutant plants yielded one or more  $k$ -mers supporting the postulated wild-type allele, i.e. mutant-false  
365 (MTF). Similarly, we establish the wild-type true (WTT) and wild-type false (WTF) values. Finally we define  
366 the support value for a given call by adding the supporting values and subtracting the contradicting values,  
367 i.e.  $Support = MTT + WTT - MTF - WTF$ . Weighing can be applied to highlight the the presence of  
368  $k$ -mers contradicting the expected allele, as apart from error or repeat-derived contradicting  $k$ -mers, these  
369 are an indication of a given locus not being strongly linked to the causative one and consequently different in  
370 some of the individuals in the same bulk. Alternatively, MTT and WTT values can be considered separately  
371 from MTF and WTF. The sum of MTF and WTF is the the evidence contradicting a particular mutation  
372 call, and as illustrated by Figure 6, it is least pronounced in the centromeric block which contains the *ms5*  
373 mutation.

### 374 Proof-of-concept procedure for identification of heterozygous mutations

375 LNISKS (and NIKS) are designed for identification of homozygous mutations. Here we outline a procedure  
376 for the identification of heterozygous mutations using the LNISKS tool set. We first subtract the set  $M$  of  
377 *ms5* mutant  $k$ -mers from the set  $H$  of *Ms5* heterozygous fertile  $k$ -mers and subtract the set  $F$  of custom  
378 filtering  $k$ -mers from the *ms5* mutant data set  $M$ , that is:  $H \leftarrow H \setminus M$  and  $M_f \leftarrow M \setminus F$ . We then extend  
379 the  $k$ -mers from  $H'$  to obtain the set of unitigs (or seeds) representing the wild-type genotype. We only keep  
380 seeds of length  $2k - 1$  and assume that these harbour mutations at the  $k$ th base. We employ our `seedmers`  
381 module to match the mutant  $k$ -mers from  $M_f$  to the seeds, allowing a mismatch at the  $k$ th base. For each  
382 seed we record frequencies of up to  $k$   $k$ -mers representing an allele alternative to the wild-type represented  
383 by the seed. The collected information forms the bases of genotype calls.

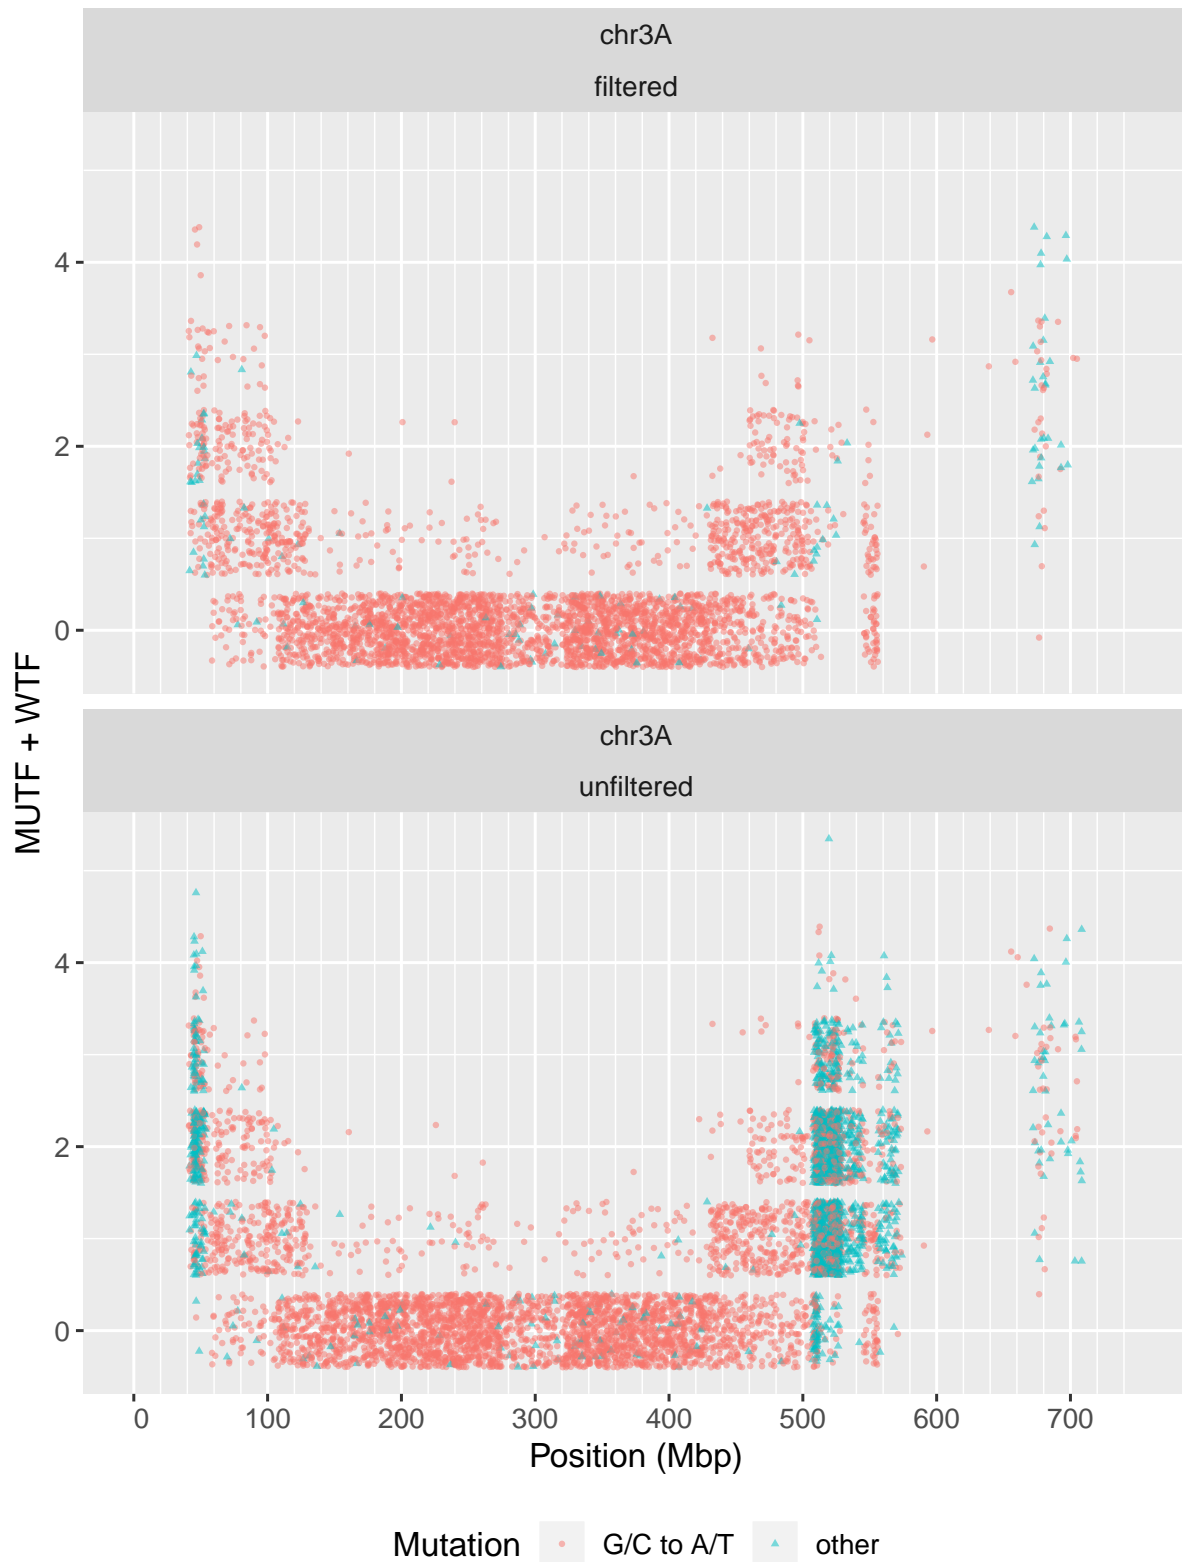

Figure 6: Identified category A mutations distributed along the 3A pseudo-chromosome. Towards the telomeres, an increasing proportion of calls are contradicted by  $k$ -mers from an increasing number of individuals.

## 384 Long unpaired seeds

385 Sequences above user defined length which remain unpaired are output by our pipeline and in some scenarios  
386 may be of interest as these may reflect e.g. presence of larger indels or sequences highly divergent between the  
387 studied datasets. In other cases this output is more likely to represent an assembly of contaminant sequences.

## 388 Acknowledgements

389 This research was funded by DuPont Pioneer Hi-Bred International Inc. We are grateful for additional support  
390 provided by The University of Adelaide. The authors thank the International Wheat Genome Sequencing  
391 Consortium (<http://www.wheatgenome.org>) for providing pre-publication access to IWGSC RefSeq v1.0.

## 392 Conflict of interest

393 None declared.

## 394 References

- 395 Abe, A., Kosugi, S., Yoshida, K., Natsume, S., Takagi, H., Kanzaki, H., Matsumura, H., Yoshida, K.,  
396 Mitsuoka, C., Tamiru, M., Innan, H., Cano, L., Kamoun, S., and Terauchi, R. (2012). Genome sequencing  
397 reveals agronomically important loci in rice using mutmap. *Nature Biotechnology*, **30**, 174 EP –.
- 398 Arora, S., Steuernagel, B., Chandramohan, S., Long, Y., Matny, O., Johnson, R., Enk, J., Periyannan, S.,  
399 Hatta, M. A. M., Athiyannan, N., Cheema, J., Yu, G., Kangara, N., Ghosh, S., Szabo, L. J., Poland, J.,  
400 Bariana, H., Jones, J. D. G., Bentley, A. R., Ayliffe, M., Olson, E., Xu, S. S., Steffenson, B. J., Lagudah,  
401 E., and Wulff, B. B. (2018). Resistance gene discovery and cloning by sequence capture and association  
402 genetics. *bioRxiv*.
- 403 Candela, H., Casanova-Sez, R., and Micol, J. L. (2015). Getting started in mapping-by-sequencing. *Journal*  
404 *of Integrative Plant Biology*, **57**(7), 606–612.
- 405 Choulet, F., Alberti, A., Theil, S., Glover, N., Barbe, V., Daron, J., Pingault, L., Sourdille, P., Couloux,  
406 A., Paux, E., Leroy, P., Mangenot, S., Guilhot, N., Le Gouis, J., Balfourier, F., Alaux, M., Jamilloux, V.,  
407 Poulain, J., Durand, C., Bellec, A., Gaspin, C., Safar, J., Dolezel, J., Rogers, J., Vandepoele, K., Aury, J.-  
408 M., Mayer, K., Berges, H., Quesneville, H., Wincker, P., and Feuillet, C. (2014). Structural and functional  
409 partitioning of bread wheat chromosome 3b. *Science*, **345**(6194). [http://science.sciencemag.org/  
410 content/345/6194/1249721](http://science.sciencemag.org/content/345/6194/1249721).
- 411 Clavijo, B. J., Venturini, L., Schudoma, C., Accinelli, G. G., Kaithakottil, G., Wright, J., Borrill, P., Ket-  
412 tleborough, G., Heavens, D., Chapman, H., Lipscombe, J., Barker, T., Lu, F.-H., McKenzie, N., Raats,  
413 D., Ramirez-Gonzalez, R. H., Coince, A., Peel, N., Percival-Alwyn, L., Duncan, O., Trösch, J., Yu, G.,  
414 Bolser, D. M., Namaati, G., Kerhornou, A., Spannagl, M., Gundlach, H., Haberer, G., Davey, R. P., Fosker,  
415 C., Di Palma, F., Phillips, A., Millar, A. H., Kersey, P. J., Uauy, C., Krasileva, K. V., Swarbreck, D.,  
416 Bevan, M. W., and Clark, M. D. (2017). An improved assembly and annotation of the allohexaploid wheat  
417 genome identifies complete families of agronomic genes and provides genomic evidence for chromosomal  
418 translocations. *Genome Research*. <http://dx.doi.org/10.1101/gr.217117.116>.
- 419 Deorowicz, S., Kokot, M., Grabowski, S., and Debudaj-Grabysz, A. (2015). KMC 2: fast and resource-frugal  
420 k-mer counting. *Bioinformatics*, **31**(10), 1569–1576.
- 421 Edwards, D., Wilcox, S., Barrero, R. A., Fleury, D., Cavanagh, C. R., Forrest, K. L., Hayden, M. J., Mool-  
422 huijzen, P., Keeble-Gagnre, G., Bellgard, M. I., Lorenc, M. T., Shang, C. A., Baumann, U., Taylor, J. M.,  
423 Morell, M. K., Langridge, P., Appels, R., and Fitzgerald, A. (2012). Bread matters: a national initiative to  
424 profile the genetic diversity of Australian wheat. *Plant Biotechnology Journal*, **10**(6), 703–708.
- 425 Gardiner, L.-J., Gawroski, P., Olohan, L., Schnurbusch, T., Hall, N., and Hall, A. (2014). Using genic sequence  
426 capture in combination with a syntenic pseudo genome to map a deletion mutant in a wheat species. *The*  
427 *Plant Journal*, **80**(5), 895–904.

- 428 Gardiner, L.-J., Bansept-Basler, P., Olohan, L., Joynson, R., Brenchley, R., Hall, N., O'Sullivan, D. M., and  
429 Hall, A. (2016). Mapping-by-sequencing in complex polyploid genomes using genic sequence capture: a  
430 case study to map yellow rust resistance in hexaploid wheat. *The Plant Journal*, **87**(4), 403–419.
- 431 Giovannoni, J. J., Wing, R. A., Ganai, M. W., and Tanksley, S. D. (1991). Isolation of molecular markers  
432 from specific chromosomal intervals using dna pools from existing mapping populations. *Nucleic Acids Res*,  
433 **19**(23), 6553–6558. 1684420[pmid].
- 434 Greene, E. A., Codomo, C. A., Taylor, N. E., Henikoff, J. G., Till, B. J., Reynolds, S. H., Enns, L. C., Burtner,  
435 C., Johnson, J. E., Odden, A. R., Comai, L., and Henikoff, S. (2003). Spectrum of chemically induced  
436 mutations from a large-scale reverse-genetic screen in arabidopsis. *Genetics*, **164**(2), 731–740.
- 437 Hartwig, B., James, G. V., Konrad, K., Schneeberger, K., and Turck, F. (2012). Fast isogenic mapping-by-  
438 sequencing of ethyl methanesulfonate-induced mutant bulks. *Plant Physiology*, **160**(2), 591–600.
- 439 IWGSC, T. (2018). Shifting the limits in wheat research and breeding using a fully annotated reference  
440 genome. *Science*, **361**(6403).
- 441 Jordan, K. W., Wang, S., Lun, Y., Gardiner, L.-J., MacLachlan, R., Hucl, P., Wiebe, K., Wong, D., Forrest,  
442 K. L., Sharpe, A. G., Sidebottom, C. H., Hall, N., Toomajian, C., Close, T., Dubcovsky, J., Akhunova,  
443 A., Talbert, L., Bansal, U. K., Bariana, H. S., Hayden, M. J., Pozniak, C., Jeddloh, J. A., Hall, A., and  
444 Akhunov, E. (2015). A haplotype map of allohexaploid wheat reveals distinct patterns of selection on  
445 homoeologous genomes. *Genome Biology*, **16**(1), 48.
- 446 Kokot, M., Dugosz, M., and Deorowicz, S. (2017). KMC 3: counting and manipulating k-mer statistics.  
447 *Bioinformatics*, **33**(17), 2759–2761.
- 448 Krasileva, K. V., Vasquez-Gross, H. A., Howell, T., Bailey, P., Paraiso, F., Clissold, L., Simmonds, J., Ramirez-  
449 Gonzalez, R. H., Wang, X., Borrill, P., Fosker, C., Ayling, S., Phillips, A. L., Uauy, C., and Dubcovsky, J.  
450 (2017). Uncovering hidden variation in polyploid wheat. *Proc Natl Acad Sci U S A*, **114**(6), E913–E921.  
451 201619268[PII].
- 452 Leggett, R. M. and MacLean, D. (2014). Reference-free snp detection: dealing with the data deluge. *BMC*  
453 *Genomics*, **15**(4), S10.
- 454 Mascher, M., Jost, M., Kuon, J.-E., Himmelbach, A., Abfal, A., Beier, S., Scholz, U., Graner, A., and Stein,  
455 N. (2014). Mapping-by-sequencing accelerates forward genetics in barley. *Genome Biology*, **15**(6), R78.
- 456 Michelmore, R. W., Paran, I., and Kesseli, R. V. (1991). Identification of markers linked to disease-resistance  
457 genes by bulked segregant analysis: a rapid method to detect markers in specific genomic regions by using  
458 segregating populations. *Proc Natl Acad Sci U S A*, **88**(21), 9828–9832. 1682921[pmid].
- 459 Nordström, K. J. V., Albani, M. C., James, G. V., Gutjahr, C., Hartwig, B., Turck, F., Paszkowski, U.,  
460 Coupland, G., and Schneeberger, K. (2013). Mutation identification by direct comparison of whole-genome  
461 sequencing data from mutant and wild-type individuals using k-mers. *Nature Biotechnology*, **31**, 325 EP  
462 –.
- 463 Pallotta, M. A., Warner, P., Kouidri, A., Tucker, E., Baes, M., Suchecki, R., Watson-Haigh, N. S., Okada,  
464 T., Garcia, M., Sandhu, A., Singh, M., Wolters, P., Albertsen, M. C., Cigan, A. M., Baumann, U., and  
465 Whitford, R. (2019). Wheat *ms5* male-sterility is induced by recessive homoeologous genes. *The Plant*  
466 *Journal*. Accepted.
- 467 Pankin, A., Campoli, C., Dong, X., Kilian, B., Sharma, R., Himmelbach, A., Saini, R., Davis, S. J., Stein,  
468 N., Schneeberger, K., and von Korff, M. (2014). Mapping-by-sequencing identifies hvphytochrome c as a  
469 candidate gene for the early maturity 5 locus modulating the circadian clock and photoperiodic flowering  
470 in barley. *Genetics*, **198**(1), 383–396.
- 471 Rahman, A., Hallgrmsdttir, I., Eisen, M., and Pachter, L. (2018). Association mapping from sequencing reads  
472 using *k*-mers. *eLife*, **7**, e32920.
- 473 Ramirez-Gonzalez, R. H., Segovia, V., Bird, N., Fenwick, P., Holdgate, S., Berry, S., Jack, P., Caccamo, M.,  
474 and Uauy, C. (2015). Rna-seq bulked segregant analysis enables the identification of high-resolution genetic  
475 markers for breeding in hexaploid wheat. *Plant Biotechnology Journal*, **13**(5), 613–624.



- 476 Rognes, T., Flouri, T., Nichols, B., Quince, C., and Mah, F. (2016). Vsearch: a versatile open source tool  
477 for metagenomics. *PeerJ*, **4**, e2584.
- 478 Sánchez-Martín, J., Steuernagel, B., Ghosh, S., Herren, G., Hurni, S., Adamski, N., Vrána, J., Kubaláková,  
479 M., Krattinger, S. G., Wicker, T., Doležel, J., Keller, B., and Wulff, B. B. H. (2016). Rapid gene isolation  
480 in barley and wheat by mutant chromosome sequencing. *Genome Biology*, **17**(1), 221.
- 481 Schneeberger, K., Ossowski, S., Lanz, C., Juul, T., Petersen, A. H., Nielsen, K. L., Jørgensen, J.-E., Weigel,  
482 D., and Andersen, S. U. (2009). Shoremap: simultaneous mapping and mutation identification by deep  
483 sequencing. *Nature Methods*, **6**, 550 EP –. Correspondence.
- 484 Thind, A. K., Wicker, T., Simková, H., Fossati, D., Moullet, O., Brabant, C., Vrána, J., Dolezel, J., and  
485 Krattinger, S. G. (2017). Rapid cloning of genes in hexaploid wheat using cultivar-specific long-range  
486 chromosome assembly. *Nature Biotechnology*, **35**, 793 EP –.
- 487 van Esse, G. W., Walla, A., Finke, A., Koornneef, M., Pecinka, A., and von Korff, M. (2017). Six-rowed  
488 spike3 (*vrs3*) is a histone demethylase that controls lateral spikelet development in barley. *Plant Physiol*,  
489 **174**(4), 2397–2408. PP201700108R1[PII].
- 490 Wang, Y., Xie, J., Zhang, H., Guo, B., Ning, S., Chen, Y., Lu, P., Wu, Q., Li, M., Zhang, D., Guo, G., Zhang,  
491 Y., Liu, D., Zou, S., Tang, J., Zhao, H., Wang, X., Li, J., Yang, W., Cao, T., Yin, G., and Liu, Z. (2017).  
492 Mapping stripe rust resistance gene *yrzh22* in chinese wheat cultivar zhoumai 22 by bulked segregant rna-seq  
493 (bsr-seq) and comparative genomics analyses. *Theoretical and Applied Genetics*, **130**(10), 2191–2201.
- 494 Wicker, T., Mayer, K. F., Gundlach, H., Martis, M., Steuernagel, B., Scholz, U., Šimková, H., Kubaláková,  
495 M., Choulet, F., Taudien, S., Platzer, M., Feuillet, C., Fahima, T., Budak, H., Doležel, J., Keller, B.,  
496 and Stein, N. (2011). Frequent gene movement and pseudogene evolution is common to the large and  
497 complex genomes of wheat, barley, and their relatives. *The Plant Cell Online*, **23**(5), 1706–1718. <http://www.plantcell.org/content/23/5/1706>.
- 498
- 499 Wickham, H. (2009). *ggplot2: Elegant Graphics for Data Analysis*. Springer-Verlag New York.
- 500 Yan, W., Chen, Z., Lu, J., Xu, C., Xie, G., Li, Y., Deng, X. W., He, H., and Tang, X. (2017). Simultaneous  
501 identification of multiple causal mutations in rice. *Frontiers in Plant Science*, **7**, 2055.
- 502 Zimin, A. V., Puiu, D., Hall, R., Kingan, S., Clavijo, B. J., and Salzberg, S. L. (2017). The first near-  
503 complete assembly of the hexaploid bread wheat genome, *Triticum aestivum*. *GigaScience*, **6**(11), 1–7.  
504 <http://dx.doi.org/10.1093/gigascience/gix097>.
- 505 Zuryn, S., Le Gras, S., Jamet, K., and Jarriault, S. (2010). A strategy for direct mapping and identification  
506 of mutations by whole-genome sequencing. *Genetics*, **186**(1), 427–430.
